# Supplementary material
Source: MDPI journal article supplement (https://www.mdpi.com/2073-445X/9/9/331)

**Figure S1.** Number of studies according to their content in terms of (a) knowledge co-production, (b) collaboration/engagement mentioned, (c) future recommendations given

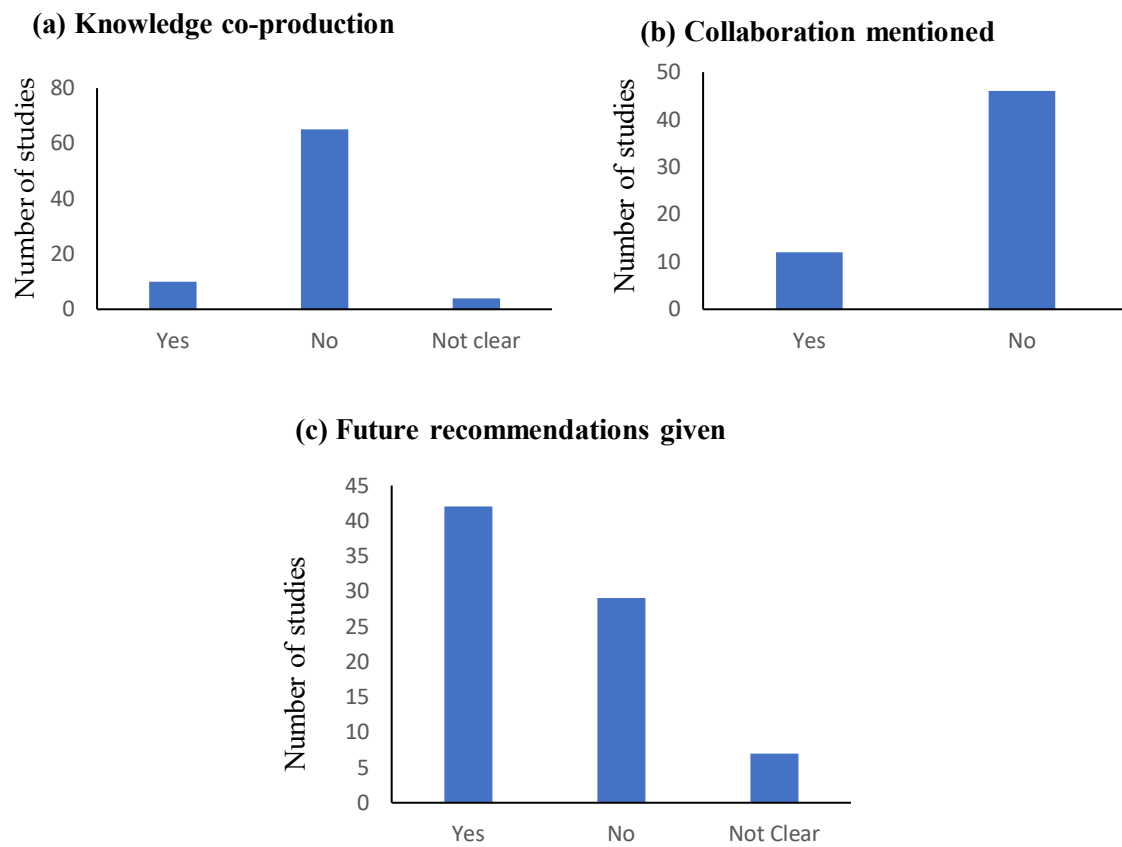

Supplement: s1 [file s1]
